# Supplementary material
Source: MDPI journal article supplement (https://www.mdpi.com/2304-6740/9/7/50)
Supplement: s1 [file s1]

Supplementary Materials

# Chiral or Luminescent Lanthanide Single-Molecule Magnets Involving Bridging Redox Active Triad Ligand

Bertrand Lefeuvre, Jessica Flores Gonzalez, Carlo Andrea Mattei, Vincent Dorcet, Olivier Cador and Fabrice Pointillart \*

ISCR (Institut des Sciences Chimiques de Rennes)—UMR-CNRS 6226, Univ Rennes, 35000 Rennes, France; bertrand.lefeuvre@univ-rennes1.fr (B.L.); jessica.flores-gonzales@univ-rennes1.fr (J.F.G.); carlo-andrea.mattei@univ-rennes1.fr (C.A.M.); vincent.dorcet@univ-rennes1.fr (V.D.); olivier.cador@univ-rennes1.fr (O.C.)

\* Correspondence: fabrice.pointillart@univ-rennes1.fr; Tel.: +33-(0)2-23-23-57-62; Fax: +33-(0)2-23-23-68-40

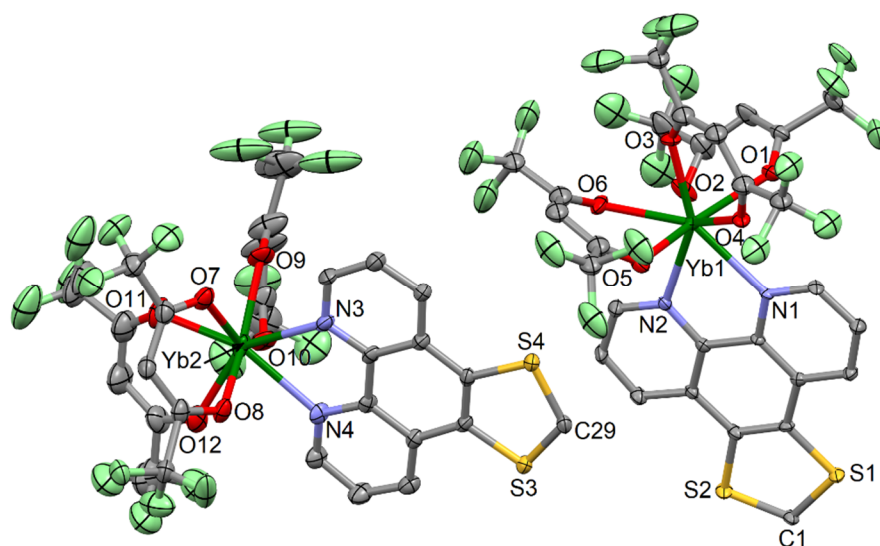

**Figure S1.** ORTEP view of the asymmetric unit for (1)·2(C<sub>7</sub>H<sub>16</sub>). Thermal ellipsoids are drawn at 30% probability. Hydrogen atoms and solvent molecules of crystallization are omitted for clarity.

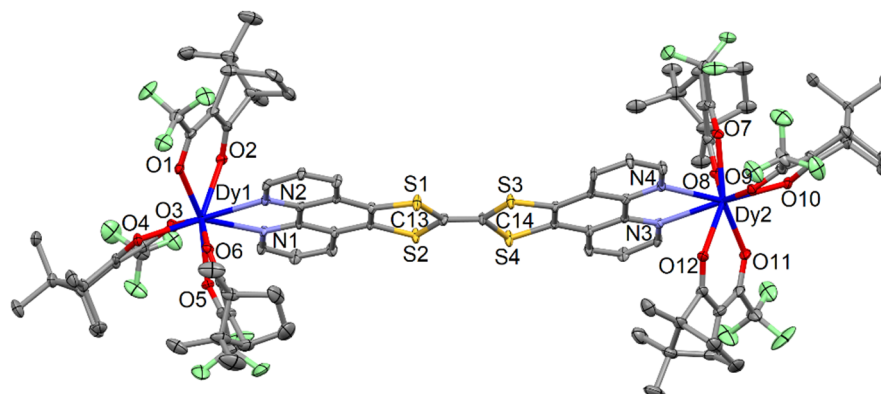

**Figure S2.** ORTEP view of the asymmetric unit for (2)·2(C<sub>6</sub>H<sub>14</sub>). Thermal ellipsoids are drawn at 30% probability. Hydrogen atoms and solvent molecules of crystallization are omitted for clarity.

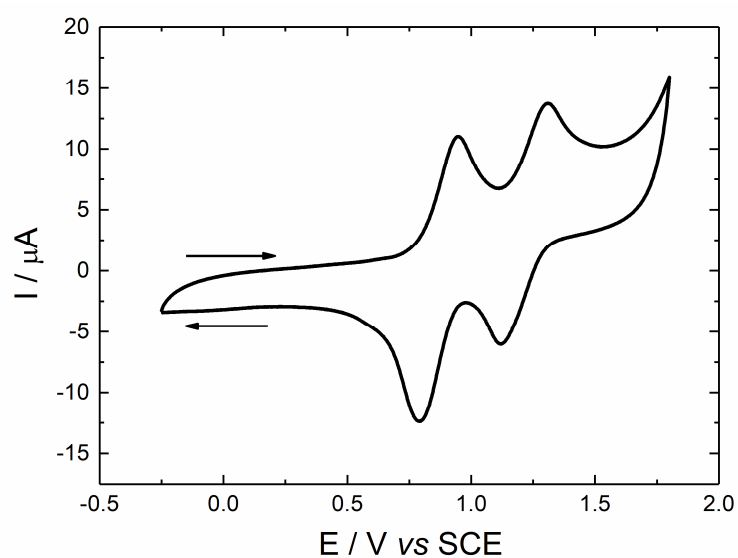

**Figure S3.** Cyclic voltammograms of **1** in  $\text{CH}_2\text{Cl}_2$  at a scan rate of  $100 \text{ mV}\cdot\text{s}^{-1}$ . The potentials were measured *vs.* a saturated calomel electrode (SCE) with Pt wires as working and counter electrodes.

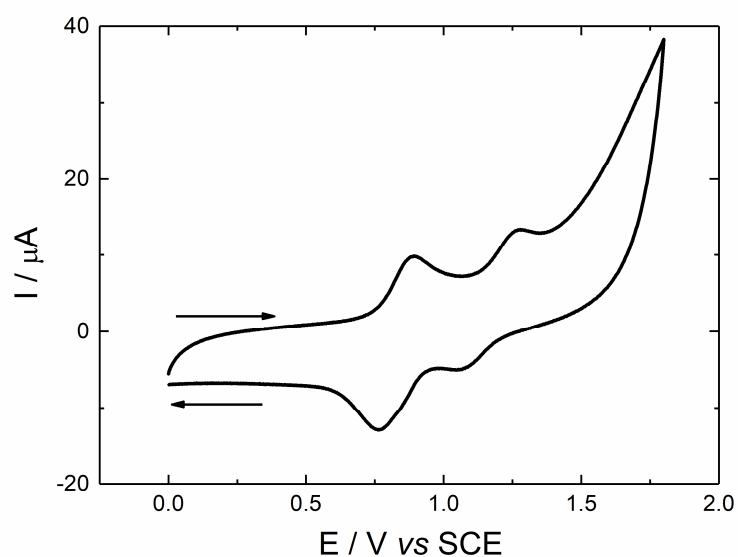

**Figure S4.** Cyclic voltammetry of **2** in  $\text{CH}_2\text{Cl}_2$  at a scan rate of  $100 \text{ mV}\cdot\text{s}^{-1}$ . The potentials were measured *versus* a saturated calomel electrode (SCE) with Pt wire as the counter electrodes.

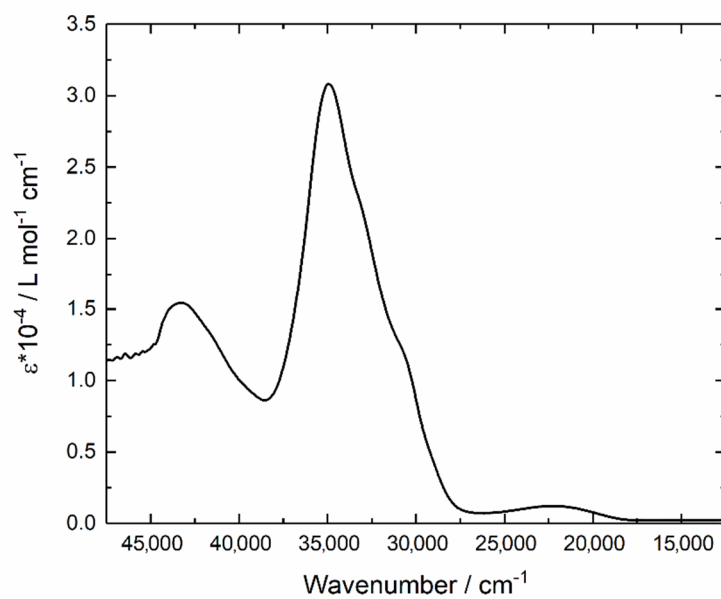

**Figure S5.** Experimental UV-visible absorption spectrum at room temperature of **1** in CH<sub>2</sub>Cl<sub>2</sub> solution ( $C = 4 \times 10^{-5} \text{ mol L}^{-1}$ ).

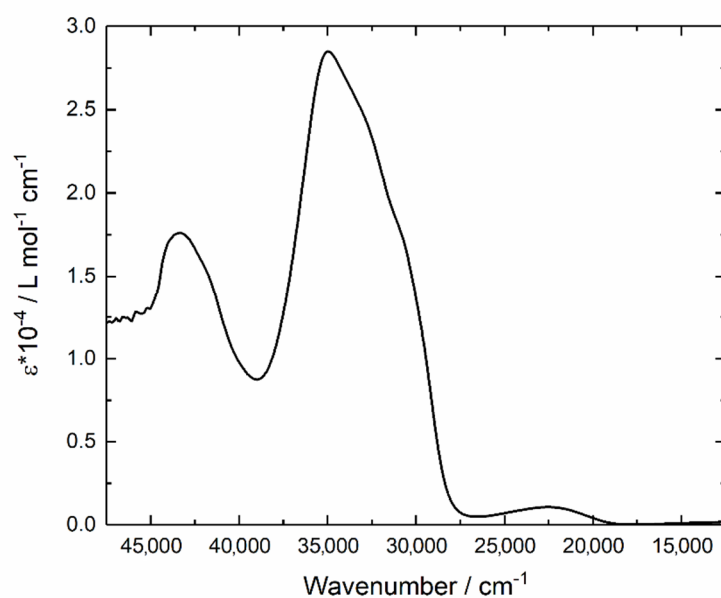

**Figure S6.** Experimental UV-visible absorption spectrum at room temperature of **2** in CH<sub>2</sub>Cl<sub>2</sub> solution ( $C = 4 \times 10^{-5} \text{ mol L}^{-1}$ ).

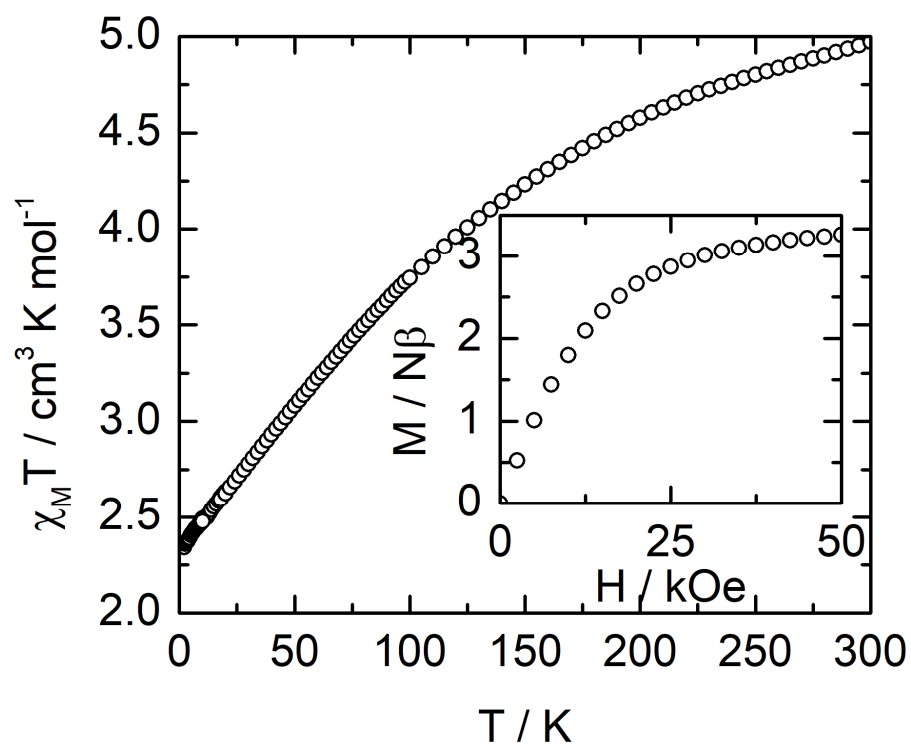

**Figure S7.** Thermal dependence of the  $\chi_M T$  product between 2 and 300 K for 1. In inset, field dependence of the magnetization at 2 K for 1.

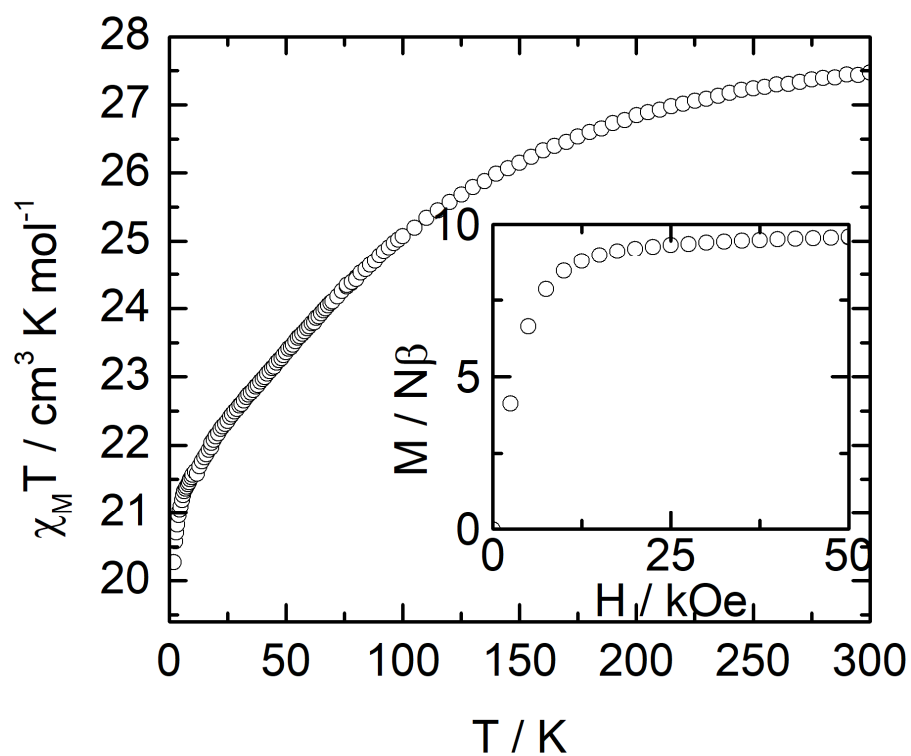

**Figure S8.** Thermal dependence of the  $\chi_M T$  product between 2 and 300 K for 2. In inset, field dependence of the magnetization at 2 K for 2.

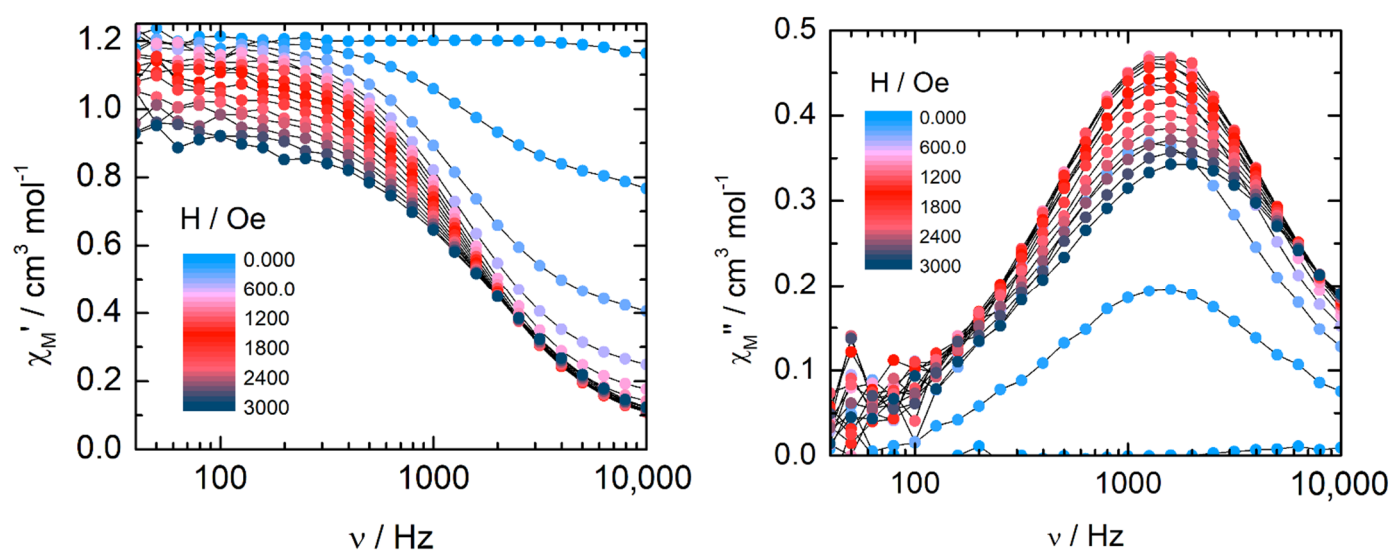

**Figure S9.** In-phase (left) and out-of-phase (right) components of the ac magnetic susceptibility for **1** at 2 K under a DC magnetic field from 0 to 3000 Oe.

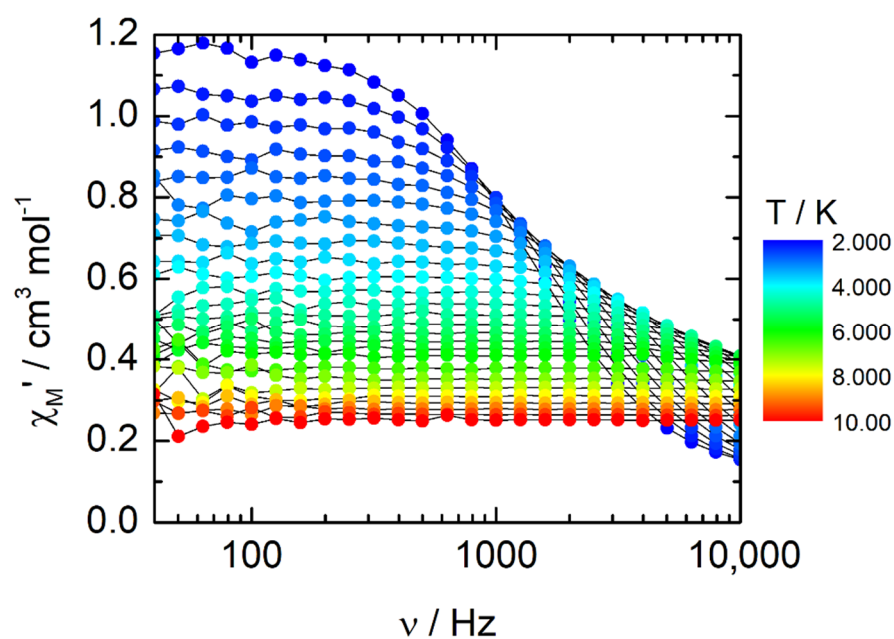

**Figure S10.** Frequency dependence of the in-phase component of the magnetic susceptibility under an applied magnetic field of 1000 Oe between 2 and 10 K for **1**.

#### Extended Debye model.

$$\chi_M' = \chi_S + (\chi_T - \chi_S) \frac{1 + (\omega\tau)^{1-\alpha} \sin\left(\alpha \frac{\pi}{2}\right)}{1 + 2(\omega\tau)^{1-\alpha} \sin\left(\alpha \frac{\pi}{2}\right) + (\omega\tau)^{2-2\alpha}}$$

$$\chi_M'' = (\chi_T - \chi_S) \frac{(\omega\tau)^{1-\alpha} \cos\left(\alpha \frac{\pi}{2}\right)}{1 + 2(\omega\tau)^{1-\alpha} \sin\left(\alpha \frac{\pi}{2}\right) + (\omega\tau)^{2-2\alpha}}$$

With  $\chi_T$  the isothermal susceptibility,  $\chi_S$  the adiabatic susceptibility,  $\tau$  the relaxation time and  $\alpha$  an empiric parameter which describe the distribution of the relaxation time. For SMM with only one relaxing object  $\alpha$  is close to zero. The extended Debye model was applied to fit simultaneously the experimental variations of  $\chi_M'$  and  $\chi_M''$  with the frequency  $\nu$  of the oscillating field ( $\omega = 2\pi\nu$ ). Typically, only the temperatures for which a maximum on the  $\chi_M''$  vs.  $\nu$  curves, have been considered. The best fitted parameters  $\tau$ ,  $\alpha$ ,  $\chi_T$ ,  $\chi_S$  are listed in Tables S5–S9 with the coefficient of determination  $R^2$ .

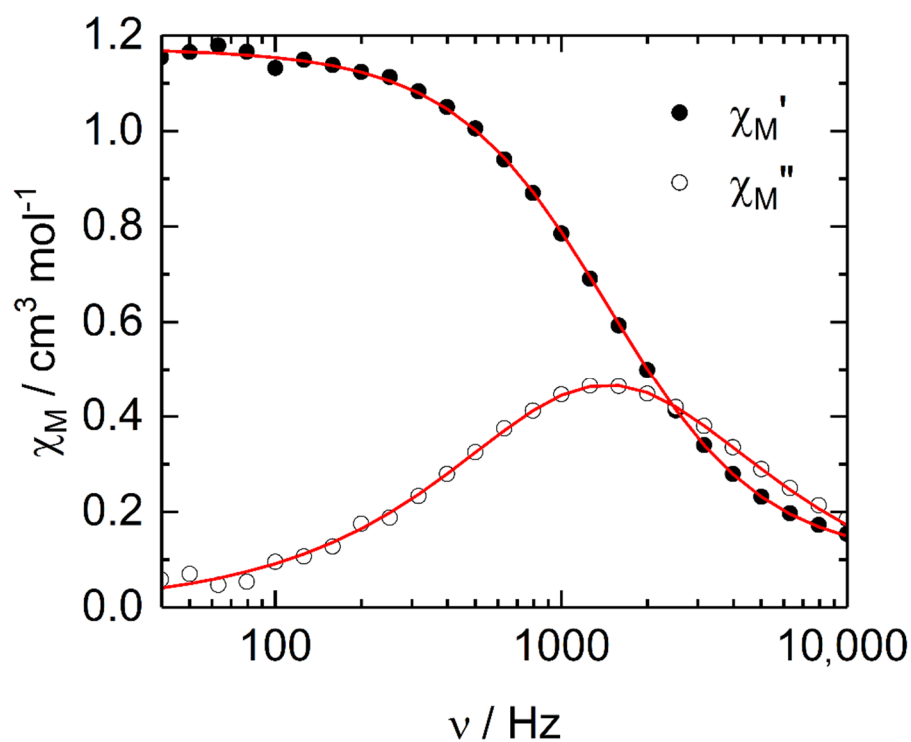

**Figure S11.** Frequency dependence of the in-phase ( $\chi_M'$ ) and out-of-phase ( $\chi_M''$ ) components of the ac susceptibility measured on powder at 2 K and 1000 Oe with the best fitted curves (red lines) for **1**.

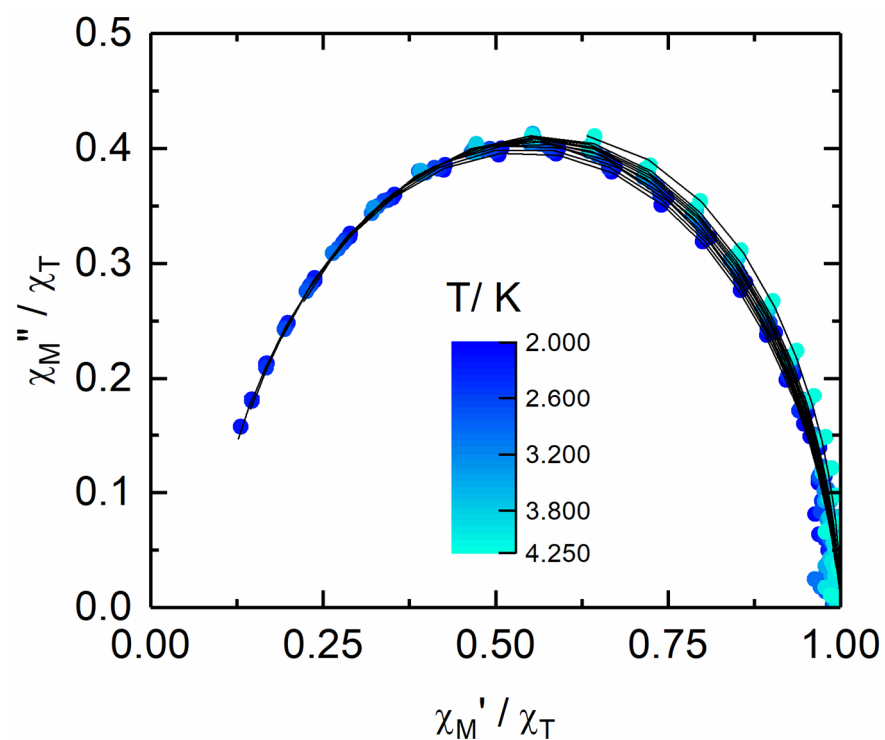

**Figure S12.** Normalized Cole-Cole plot for **1** at several temperatures between 2 and 4.25 K under an applied magnetic field of 1000 Oe. Black lines are the best fitted curves.

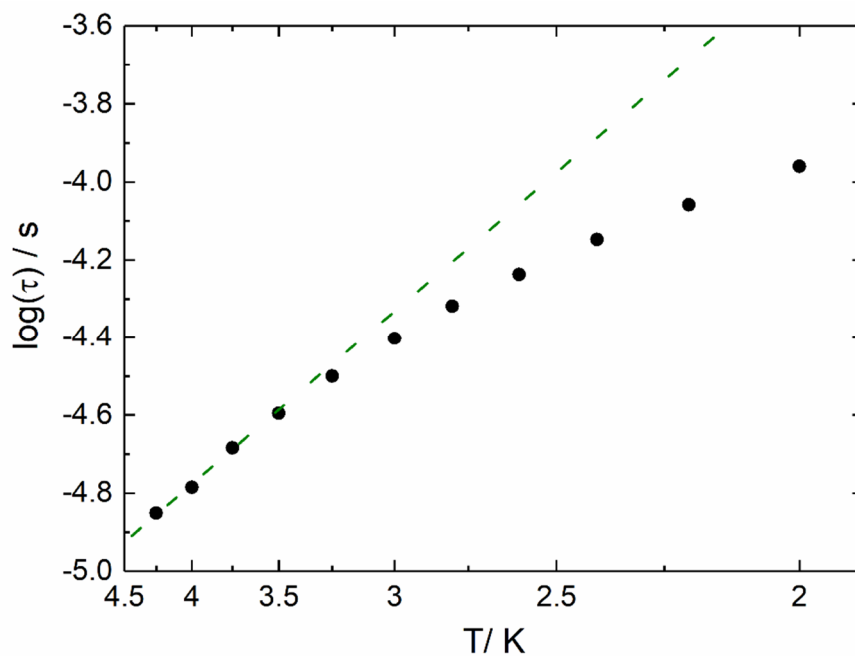

**Figure S13.** Temperature dependence of the relaxation time for **1** at 1000 Oe in the temperature range 2–4.25 K. Green dashed lines corresponds to the thermally activated contribution (Orbach process with the parameters given in the main text).

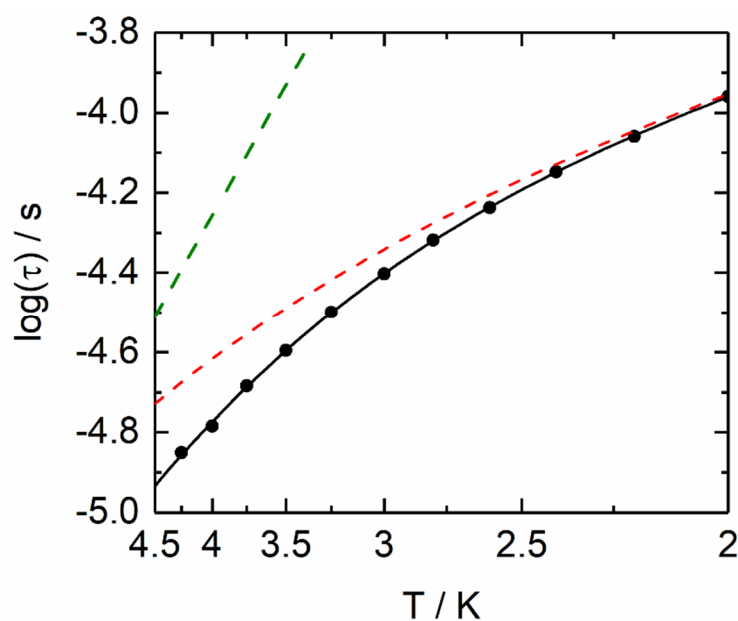

**Figure S14.** Temperature dependence of the relaxation time for **1** at 1000 Oe in the temperature range of 2–4.25 K with the best-fitted curve (full black line) with the combination Orbach + Raman processes. The Orbach and Raman contributions to the relaxation time are respectively represented in dashed green line and dashed red line (the parameters are given in the main text).

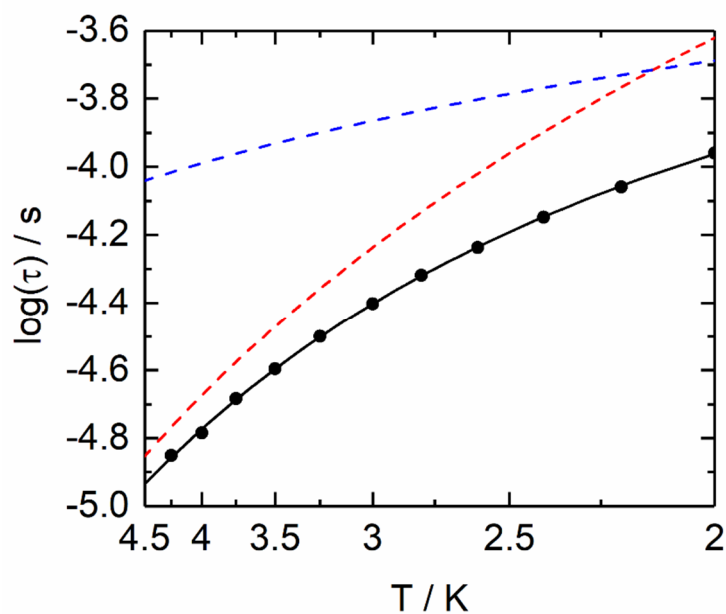

**Figure S15.** Temperature dependence of the relaxation time for **1** at 1000 Oe in the temperature range of 2–4.25 K with the best-fitted curve (full black line) with the combination Raman + direct processes. The Raman and direct contributions to the relaxation time are respectively represented in dashed red line and dashed blue line (the parameters are given in the main text).



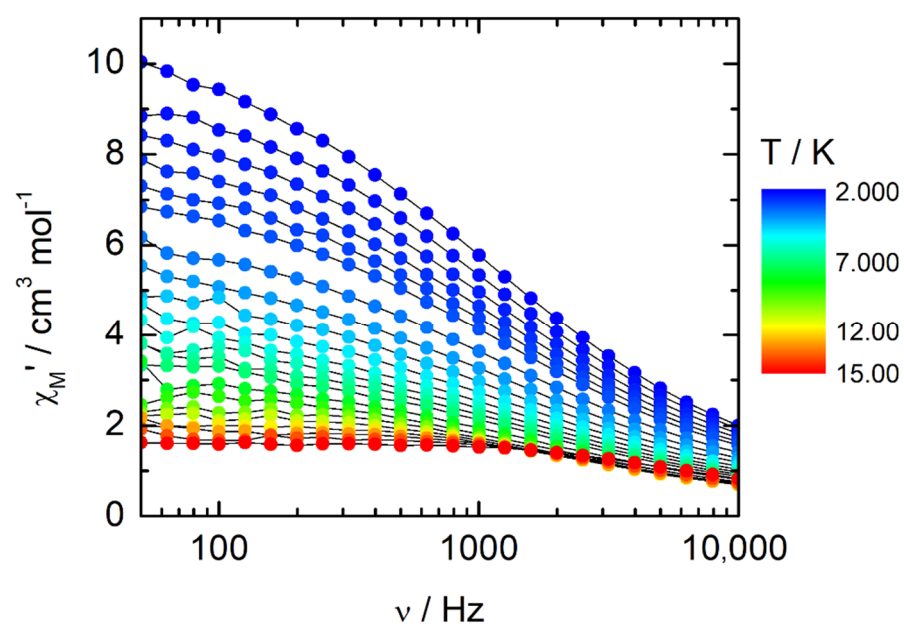

**Figure S16.** Frequency dependence of the in-phase component of the magnetic susceptibility under a zero applied magnetic field between 2 and 15 K for 2.

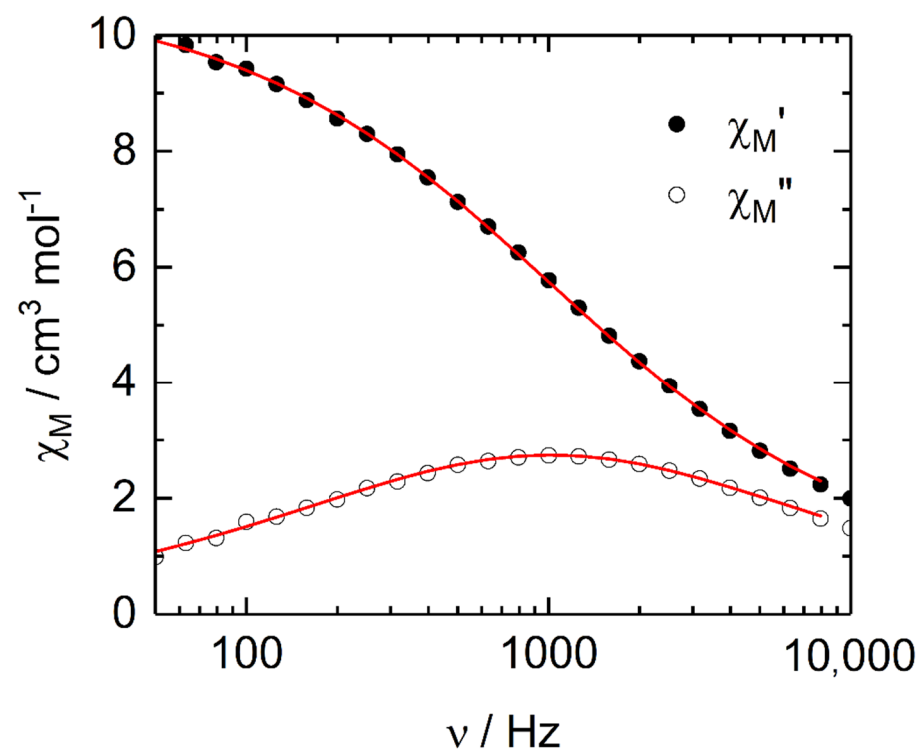

**Figure S17.** Frequency dependence of the in-phase ( $\chi_M'$ ) and out-of-phase ( $\chi_M''$ ) components of the ac susceptibility measured on powder at 2 K in zero applied dc field with the best fitted curves (red lines) for 2.

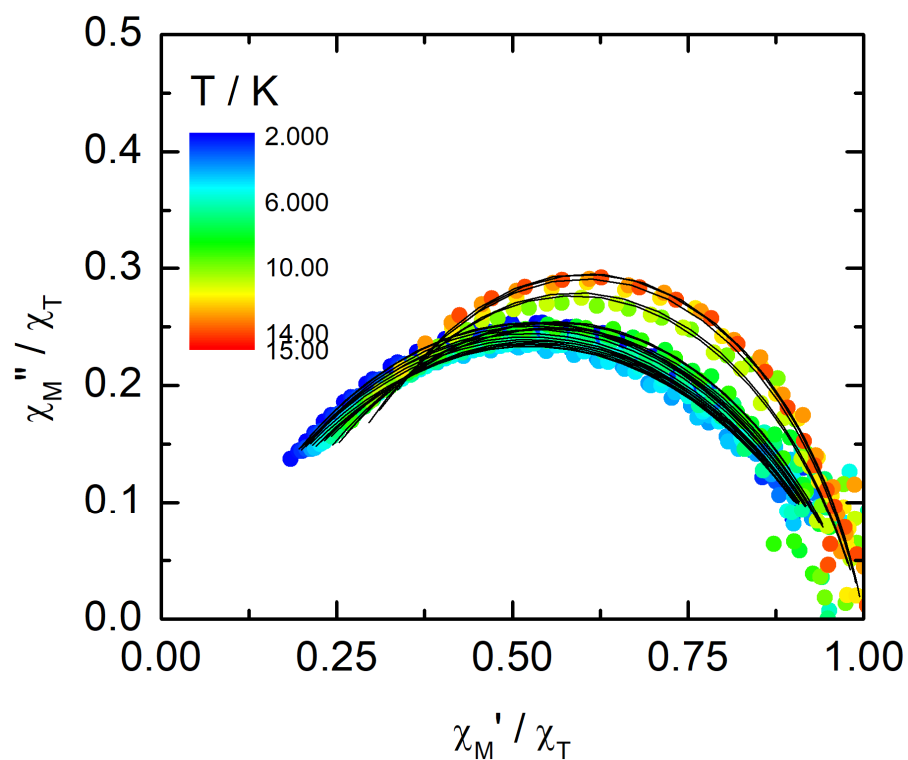

**Figure S18.** Normalized Cole-Cole plot for **2** at several temperatures between 2 and 15 K under a zero applied magnetic field. Black lines are the best fitted curves.

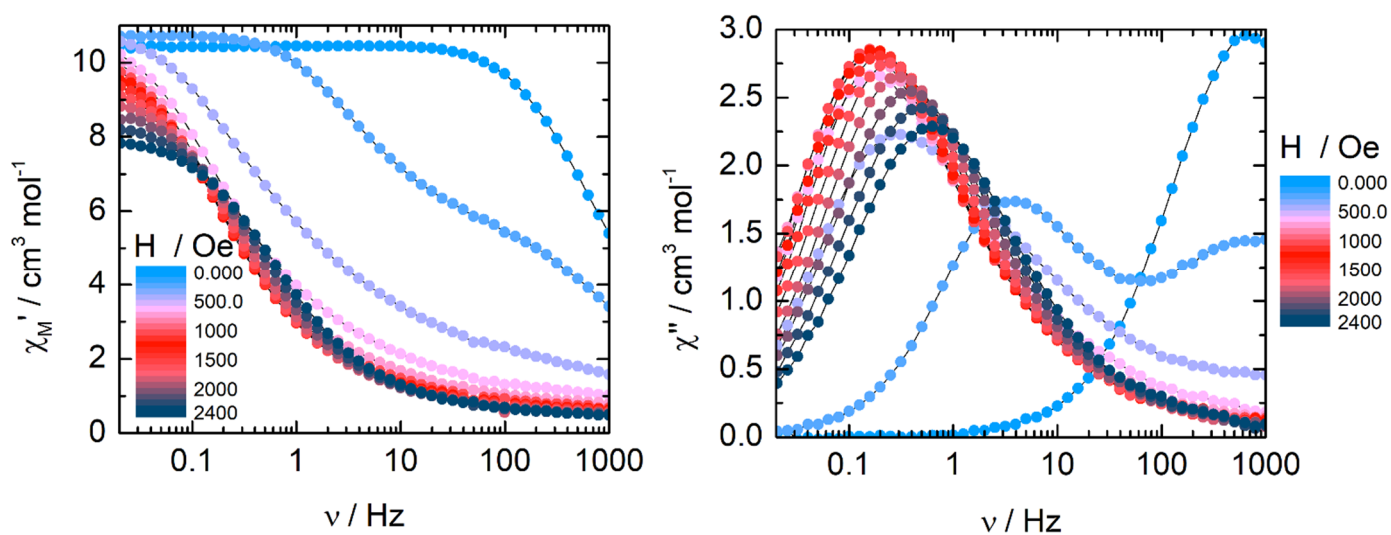

**Figure S19.** In-phase (left) and out-of-phase (right) components of the ac magnetic susceptibility for **2** at 2 K under a DC magnetic field from 0 to 2400 Oe.

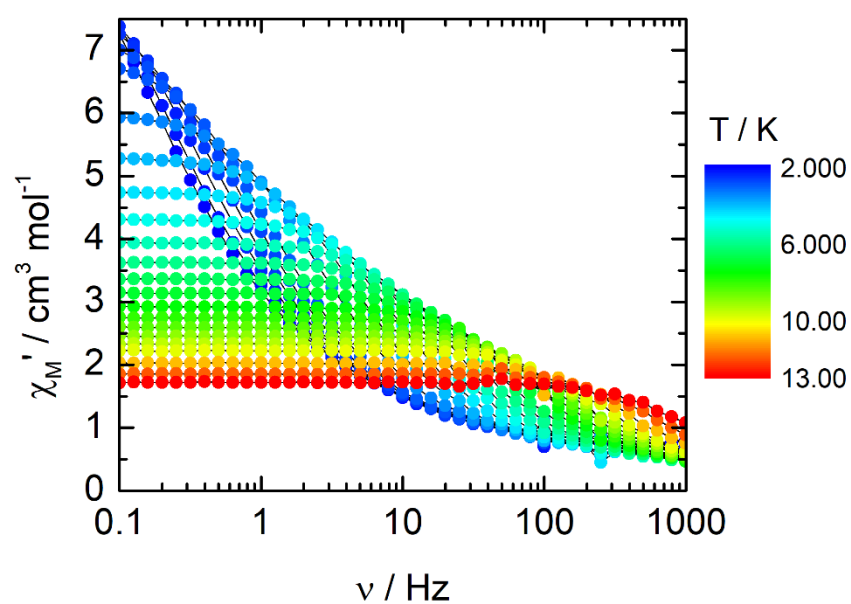

**Figure S20.** Frequency dependence of the in-phase component of the magnetic susceptibility under a 1200 Oe applied magnetic field between 2 and 13 K for **2**.

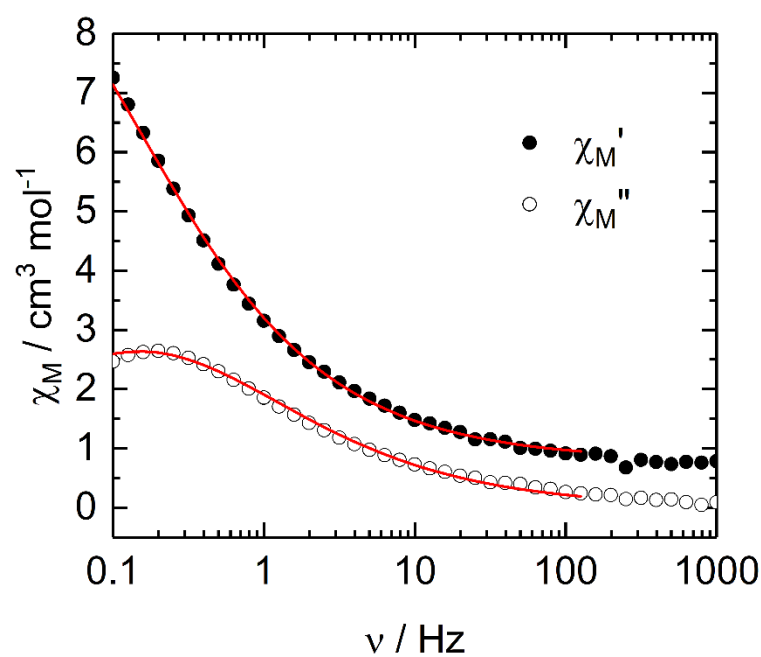

**Figure S21.** Frequency dependence of the in-phase ( $\chi_M'$ ) and out-of-phase ( $\chi_M''$ ) components of the ac susceptibility measured on powder at 2 K and 1200 Oe with the best fitted curves (red lines) for **2**.

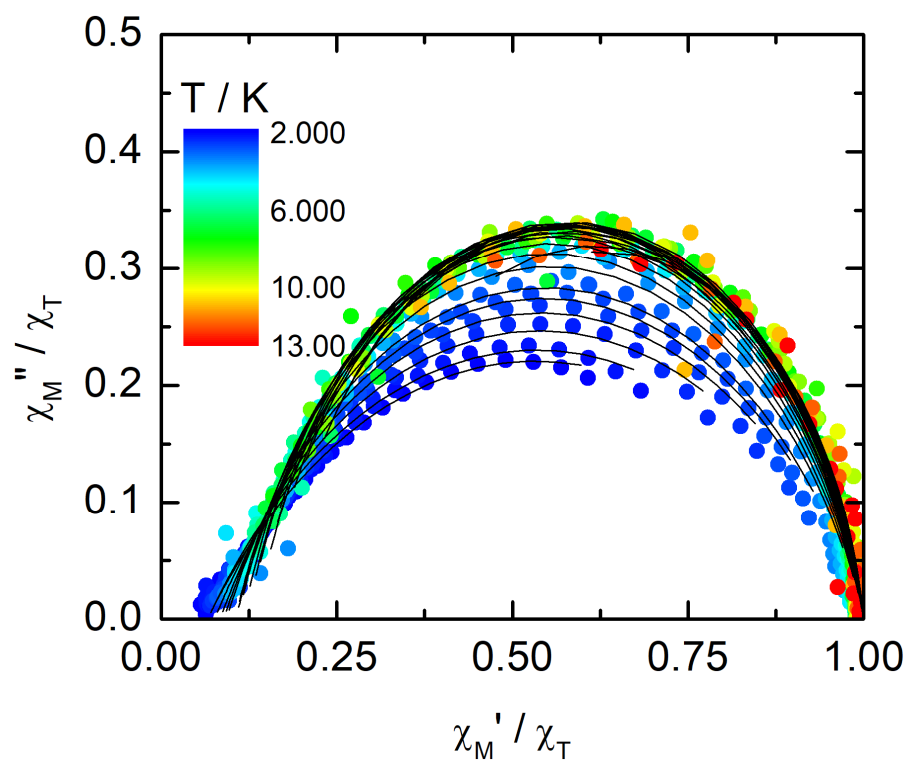

**Figure S22.** Normalized Cole-Cole plot for **2** at several temperatures between 2 and 13 K under a 1200 Oe applied magnetic field. Black lines are the best fitted curves.

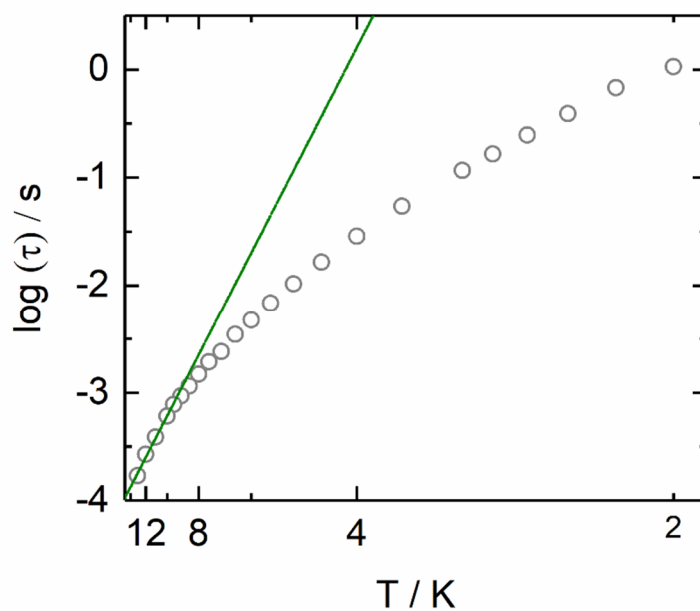

**Figure S23.** Temperature dependence of the relaxation time for **2** at 1200 Oe in the temperature range 2–13 K. Green line corresponds to the thermally activated contribution (Orbach process with the parameters given in the main text).

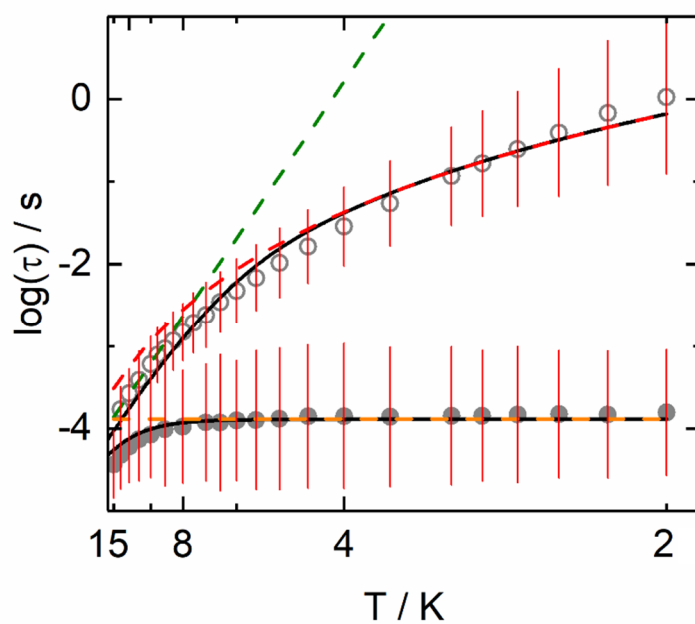

**Figure S24.** Temperature dependence of the relaxation time for **2** at 0 Oe (full gray circles) and 1200 Oe (open gray circles) in the temperature range of 2–15 K with the best-fitted curve (full black line) with the combination Orbach + Raman + QTM (for  $H = 0$  Oe) processes. The Orbach, Raman and QTM contributions to the relaxation time are respectively represented in dashed green line, dashed red line and dashed orange line (the parameters are given in the main text).

**Table S1.** X-ray crystallographic data for (1)·2(C<sub>7</sub>H<sub>16</sub>) and (2)·2(C<sub>6</sub>H<sub>14</sub>).

| Compounds                             | [Yb <sub>2</sub> (hfac) <sub>6</sub> (L)]·2(C <sub>7</sub> H <sub>16</sub> )<br>(1)·2(C <sub>7</sub> H <sub>16</sub> ) | [Dy <sub>2</sub> (+)(facam) <sub>6</sub> (L)]·2(C <sub>6</sub> H <sub>14</sub> )<br>(2)·2(C <sub>6</sub> H <sub>14</sub> ) |
|---------------------------------------|------------------------------------------------------------------------------------------------------------------------|----------------------------------------------------------------------------------------------------------------------------|
| Formula                               | C <sub>70</sub> H <sub>50</sub> Yb <sub>2</sub> F <sub>36</sub> N <sub>4</sub> O <sub>16</sub> S <sub>4</sub>          | C <sub>110</sub> H <sub>124</sub> Dy <sub>2</sub> F <sub>18</sub> N <sub>4</sub> O <sub>12</sub> S <sub>4</sub>            |
| M/g.mol <sup>-1</sup>                 | 2297.26                                                                                                                | 2489.02                                                                                                                    |
| Crystal system                        | Triclinic                                                                                                              | Monoclinic                                                                                                                 |
| Space group                           | P-1 (N°2)                                                                                                              | C2 (N°5)                                                                                                                   |
| Cell parameters                       | a = 13.8546(16) Å<br>b = 16.6640(20) Å<br>c = 19.810(20) Å<br>α = 68.703(4) °<br>β = 73.736(4) °<br>γ = 84.138 °       | a = 36.4090(30) Å<br>b = 16.7945(14) Å<br>c = 20.6077(14) Å<br>β = 109.051(2) °                                            |
| Volume/Å <sup>3</sup>                 | 4090.8(8)                                                                                                              | 11910.9(16)                                                                                                                |
| Z                                     | 2                                                                                                                      | 4                                                                                                                          |
| T/K                                   | 294 (2)                                                                                                                | 150(2)                                                                                                                     |
| 2θ range /°                           | 4.28 ≤ 2θ ≤ 55.25                                                                                                      | 5.94 ≤ 2θ ≤ 54.97                                                                                                          |
| ρcalc/g.cm <sup>-3</sup>              | 1.784                                                                                                                  | 1.292                                                                                                                      |
| μ/mm <sup>-1</sup>                    | 2.513                                                                                                                  | 1.394                                                                                                                      |
| Number of reflections                 | 87776                                                                                                                  | 139809                                                                                                                     |
| Independent reflections               | 18753                                                                                                                  | 27186                                                                                                                      |
| Rint                                  | 0.0474                                                                                                                 | 0.0541                                                                                                                     |
| Fo <sup>2</sup> > 2σ(Fo) <sup>2</sup> | 14786                                                                                                                  | 22607                                                                                                                      |
| Number of variables                   | 1055                                                                                                                   | 1226                                                                                                                       |
| R1, ωR2                               | 0.0786, 0.1807                                                                                                         | 0.0384, 0.0740                                                                                                             |

**Table S2.** SHAPE analysis of the coordination polyhedra around the lanthanide in the polymeric compounds.

| Compounds                              | Metal | CShM <sub>SAPR-8</sub><br>(square antiprism D <sub>4d</sub> ) | CShM <sub>BTTPR-8</sub><br>(biaugmented trigonal prism C <sub>2v</sub> ) | CShM <sub>TDD-8</sub><br>(triangular dodecahedron D <sub>2d</sub> ) |
|----------------------------------------|-------|---------------------------------------------------------------|--------------------------------------------------------------------------|---------------------------------------------------------------------|
|                                        |       |                                                               |                                                                          |                                                                     |
| (1)·2(C <sub>7</sub> H <sub>16</sub> ) | Yb1   | 3.226                                                         | 1.891                                                                    | 0.726                                                               |
|                                        | Yb2   | 0.804                                                         | 1.727                                                                    | 1.292                                                               |
| (2)·2(C <sub>6</sub> H <sub>14</sub> ) | Dy1   | 0.611                                                         | 1.987                                                                    | 2.274                                                               |
|                                        | Dy2   | 0.582                                                         | 2.298                                                                    | 2.012                                                               |

**Table S3.** Selected bond lengths for (1)·2(C<sub>7</sub>H<sub>16</sub>) and (2)·2(C<sub>6</sub>H<sub>14</sub>) in Å.

|        | (1)·2(C <sub>7</sub> H <sub>16</sub> ) | (2)·2(C <sub>6</sub> H <sub>14</sub> ) |
|--------|----------------------------------------|----------------------------------------|
| Yb1-N1 | 2.486(6)                               | Dy1-N1 2.553(5)                        |
| Yb1-N2 | 2.482(6)                               | Dy1-N2 2.561(7)                        |
| Yb1-O1 | 2.283(6)                               | Dy1-O1 2.295(5)                        |
| Yb1-O2 | 2.245(7)                               | Dy1-O2 2.418(5)                        |
| Yb1-O3 | 2.264(6)                               | Dy1-O3 2.278(6)                        |
| Yb1-O4 | 2.316(6)                               | Dy1-O4 2.347(5)                        |
| Yb1-O5 | 2.279(7)                               | Dy1-O5 2.293(4)                        |
| Yb1-O6 | 2.330(6)                               | Dy1-O6 2.371(6)                        |
| Yb2-N3 | 2.460(8)                               | Dy2-N3 2.560(6)                        |
| Yb2-N4 | 2.494(8)                               | Dy2-N4 2.560(5)                        |
| Yb2-O7 | 2.302(8)                               | Dy2-O7 2.316(4)                        |
| Yb2-O8 | 2.299(7)                               | Dy2-O8 2.363(6)                        |

|         |          |         |          |
|---------|----------|---------|----------|
| Yb2-O9  | 2.241(7) | Dy2-O9  | 2.273(6) |
| Yb2-O10 | 2.289(8) | Dy2-O10 | 2.352(5) |
| Yb2-O11 | 2.263(7) | Dy2-O11 | 2.295(5) |
| Yb2-O12 | 2.303(9) | Dy2-O12 | 2.400(5) |

**Table S4.** Oxidation potentials of the complexes **1** and **2** (V vs SCE, nBu<sub>4</sub>NPF<sub>6</sub>, 0.1 M in CH<sub>2</sub>Cl<sub>2</sub> at 100 mV·s<sup>−1</sup>).

|          | E <sub>1/2</sub> /V |                     | E <sub>2/2</sub> /V |                     |
|----------|---------------------|---------------------|---------------------|---------------------|
|          | oxE <sub>1/2</sub>  | redE <sub>1/2</sub> | oxE <sub>2/2</sub>  | redE <sub>2/2</sub> |
| <b>1</b> | 0.79                | 0.94                | 1.12                | 1.31                |
| <b>2</b> | 0.77                | 0.89                | 1.06                | 1.28                |

**Table S5.** Best fitted parameters ( $\chi_T$ ,  $\chi_S$ ,  $\tau$  and  $\alpha$ ) with the extended Debye model for compound **1** at 2 K in the magnetic field range 200–3000 Oe.

| H/Oe | $\chi_S/\text{cm}^3 \text{mol}^{-1}$ | $\chi_T/\text{cm}^3 \text{mol}^{-1}$ | $\tau/\text{s}$          | $\alpha$ | R <sup>2</sup> |
|------|--------------------------------------|--------------------------------------|--------------------------|----------|----------------|
| 200  | 0.7638                               | 1.20519                              | 1.05006×10 <sup>−4</sup> | 0.06511  | 0.99953        |
| 400  | 0.38111                              | 1.19576                              | 1.16489×10 <sup>−4</sup> | 0.06099  | 0.99894        |
| 600  | 0.20769                              | 1.19323                              | 1.17414×10 <sup>−4</sup> | 0.07567  | 0.99904        |
| 800  | 0.12184                              | 1.1966                               | 1.15902×10 <sup>−4</sup> | 0.09469  | 0.99916        |
| 1000 | 0.09218                              | 1.16291                              | 1.11643×10 <sup>−4</sup> | 0.07705  | 0.99933        |
| 1200 | 0.06389                              | 1.15369                              | 1.10151×10 <sup>−4</sup> | 0.09315  | 0.99938        |
| 1400 | 0.05907                              | 1.12899                              | 1.08828×10 <sup>−4</sup> | 0.09026  | 0.99929        |
| 1600 | 0.03066                              | 1.13146                              | 1.08811×10 <sup>−4</sup> | 0.13502  | 0.99869        |
| 1800 | 0.03416                              | 1.10227                              | 1.07326×10 <sup>−4</sup> | 0.13122  | 0.99885        |
| 2000 | 0.0257                               | 1.08217                              | 1.05455×10 <sup>−4</sup> | 0.14908  | 0.9995         |
| 2200 | 0.02116                              | 1.04837                              | 1.01673×10 <sup>−4</sup> | 0.15667  | 0.99889        |
| 2400 | 0.01541                              | 1.02694                              | 9.89154×10 <sup>−5</sup> | 0.17065  | 0.99731        |
| 2600 | 0.01915                              | 0.99514                              | 9.55637×10 <sup>−5</sup> | 0.17017  | 0.99926        |
| 2800 | 0.00754                              | 0.96996                              | 9.08483×10 <sup>−5</sup> | 0.19122  | 0.99769        |
| 3000 | 0.01328                              | 0.93759                              | 8.6781×10 <sup>−5</sup>  | 0.18679  | 0.99904        |

**Table S6.** Best fitted parameters ( $\chi_T$ ,  $\chi_S$ ,  $\tau$  and  $\alpha$ ) with the extended Debye model for compound **1** at 1000 Oe in the temperature range 2–4.25 K.

| T / K | $\chi_S / \text{cm}^3 \text{mol}^{-1}$ | $\chi_T / \text{cm}^3 \text{mol}^{-1}$ | $\tau / \text{s}$        | $\alpha$ | R <sup>2</sup> |
|-------|----------------------------------------|----------------------------------------|--------------------------|----------|----------------|
| 2     | 0.09347                                | 1.17539                                | 1.09694×10 <sup>−4</sup> | 0.09371  | 0.99956        |
| 2.2   | 0.09322                                | 1.06932                                | 8.73066×10 <sup>−5</sup> | 0.07876  | 0.99942        |
| 2.4   | 0.08396                                | 0.99504                                | 7.11925×10 <sup>−5</sup> | 0.08516  | 0.99939        |
| 2.6   | 0.08315                                | 0.91848                                | 5.79604×10 <sup>−5</sup> | 0.0744   | 0.99936        |
| 2.8   | 0.08369                                | 0.85759                                | 4.80018×10 <sup>−5</sup> | 0.06663  | 0.99953        |
| 3     | 0.07812                                | 0.80396                                | 3.95946×10 <sup>−5</sup> | 0.06645  | 0.9987         |
| 3.25  | 0.07894                                | 0.74438                                | 3.16372×10 <sup>−5</sup> | 0.05767  | 0.99925        |
| 3.5   | 0.07718                                | 0.69348                                | 2.53793×10 <sup>−5</sup> | 0.05243  | 0.99927        |
| 3.75  | 0.08336                                | 0.64617                                | 2.07009×10 <sup>−5</sup> | 0.03661  | 0.99846        |
| 4     | 0.0717                                 | 0.60939                                | 1.64068×10 <sup>−5</sup> | 0.04608  | 0.99951        |
| 4.25  | 0.09275                                | 0.56677                                | 1.40916×10 <sup>−5</sup> | 0.00638  | 0.99704        |

**Table S7.** Best fitted parameters ( $\chi_T$ ,  $\chi_S$ ,  $\tau$  and  $\alpha$ ) with the extended Debye model for compound 2 at 0 Oe in the temperature range 2–14 K.

| T / K | $\chi_S$ / cm <sup>3</sup> mol <sup>-1</sup> | $\chi_T$ / cm <sup>3</sup> mol <sup>-1</sup> | $\tau$ / s               | $\alpha$ | R <sup>2</sup> |
|-------|----------------------------------------------|----------------------------------------------|--------------------------|----------|----------------|
| 2     | 0.62144                                      | 10.81489                                     | 1.56848×10 <sup>-4</sup> | 0.37103  | 0.99981        |
| 2.2   | 0.55615                                      | 9.83332                                      | 1.48231×10 <sup>-4</sup> | 0.37351  | 0.99956        |
| 2.4   | 0.54267                                      | 9.15966                                      | 1.49025×10 <sup>-4</sup> | 0.37654  | 0.99995        |
| 2.6   | 0.40669                                      | 8.6343                                       | 1.47913×10 <sup>-4</sup> | 0.39682  | 0.99951        |
| 2.8   | 0.46312                                      | 7.94761                                      | 1.42658×10 <sup>-4</sup> | 0.38346  | 0.99985        |
| 3     | 0.35609                                      | 7.57812                                      | 1.4287×10 <sup>-4</sup>  | 0.40306  | 0.99975        |
| 3.5   | 0.32741                                      | 6.61907                                      | 1.3917×10 <sup>-4</sup>  | 0.40645  | 0.9995         |
| 4     | 0.27751                                      | 5.98642                                      | 1.41778×10 <sup>-4</sup> | 0.4201   | 0.99946        |
| 4.5   | 0.29795                                      | 5.40421                                      | 1.40793×10 <sup>-4</sup> | 0.41504  | 0.9988         |
| 5     | 0.27713                                      | 4.84938                                      | 1.31352×10 <sup>-4</sup> | 0.41091  | 0.99963        |
| 5.5   | 0.28506                                      | 4.42532                                      | 1.27402×10 <sup>-4</sup> | 0.40447  | 0.99981        |
| 6     | 0.41683                                      | 3.99764                                      | 1.24825×10 <sup>-4</sup> | 0.35565  | 0.99692        |
| 6.5   | 0.27227                                      | 3.80159                                      | 1.17991×10 <sup>-4</sup> | 0.39669  | 0.99974        |
| 7     | 0.39818                                      | 3.5018                                       | 1.18553×10 <sup>-4</sup> | 0.34721  | 0.99592        |
| 8     | 0.36508                                      | 3.06919                                      | 1.04991×10 <sup>-4</sup> | 0.33518  | 0.99856        |
| 9     | 0.33816                                      | 2.80952                                      | 9.792×10 <sup>-5</sup>   | 0.33237  | 0.99927        |
| 10    | 0.42363                                      | 2.42743                                      | 8.42934×10 <sup>-5</sup> | 0.24849  | 0.99751        |
| 11    | 0.40547                                      | 2.24926                                      | 7.41286×10 <sup>-5</sup> | 0.23914  | 0.99728        |
| 12    | 0.41219                                      | 2.02696                                      | 6.04731×10 <sup>-5</sup> | 0.19686  | 0.9976         |
| 13    | 0.39028                                      | 1.87834                                      | 4.79685×10 <sup>-5</sup> | 0.18472  | 0.9991         |
| 14    | 0.38209                                      | 1.76251                                      | 3.66555×10 <sup>-5</sup> | 0.1781   | 0.99663        |

**Table S8.** Best fitted parameters ( $\chi_T$ ,  $\chi_S$ ,  $\tau$  and  $\alpha$ ) with the extended Debye model for compound 2 at 2 K in the magnetic field range 200–2400 Oe.

| H / Oe | $\chi_S$ / cm <sup>3</sup> mol <sup>-1</sup> | $\chi_T$ / cm <sup>3</sup> mol <sup>-1</sup> | $\tau$ / s | $\alpha$ | R <sup>2</sup> |
|--------|----------------------------------------------|----------------------------------------------|------------|----------|----------------|
| 200    | 0.16073                                      | 2.57351                                      | 0.04662    | 0.17685  | 0.99991        |
| 400    | 0.94027                                      | 7.10845                                      | 0.32873    | 0.51658  | 0.99733        |
| 600    | 0.63668                                      | 7.07133                                      | 0.747      | 0.45335  | 0.99771        |
| 800    | 0.52229                                      | 6.87458                                      | 0.86705    | 0.41637  | 0.9981         |
| 1000   | 0.46183                                      | 6.64219                                      | 0.84806    | 0.3918   | 0.99825        |
| 1200   | 0.42581                                      | 6.38269                                      | 0.77013    | 0.37101  | 0.99845        |
| 1400   | 0.40214                                      | 6.13232                                      | 0.67025    | 0.35399  | 0.99858        |
| 1600   | 0.37745                                      | 5.86072                                      | 0.5584     | 0.34098  | 0.99879        |
| 1800   | 0.36148                                      | 5.59157                                      | 0.45422    | 0.33005  | 0.999          |
| 2000   | 0.34285                                      | 5.32637                                      | 0.36271    | 0.32385  | 0.99907        |
| 2200   | 0.32545                                      | 5.05932                                      | 0.28662    | 0.32275  | 0.99931        |
| 2400   | 0.31288                                      | 4.79722                                      | 0.22604    | 0.32177  | 0.99943        |



**Table S9.** Best fitted parameters ( $\chi_T$ ,  $\chi_S$ ,  $\tau$  and  $\alpha$ ) with the extended Debye model for compound 2 at 1200 Oe in the temperature range 2–13 K.

| T / K | $\chi_S$ / cm <sup>3</sup> mol <sup>-1</sup> | $\chi_T$ / cm <sup>3</sup> mol <sup>-1</sup> | $\tau$ / s               | $\alpha$ | R <sup>2</sup> |
|-------|----------------------------------------------|----------------------------------------------|--------------------------|----------|----------------|
| 2     | 0.78645                                      | 11.94186                                     | 1.06114                  | 0.43791  | 0.99901        |
| 2.2   | 0.71857                                      | 10.80345                                     | 0.67974                  | 0.41669  | 0.99845        |
| 2.4   | 0.72283                                      | 9.48483                                      | 0.39238                  | 0.37555  | 0.99842        |
| 2.6   | 0.71911                                      | 8.54961                                      | 0.24829                  | 0.33835  | 0.99844        |
| 2.8   | 0.69809                                      | 7.82941                                      | 0.16603                  | 0.30986  | 0.99866        |
| 3     | 0.67757                                      | 7.26918                                      | 0.11663                  | 0.28883  | 0.9987         |
| 3.5   | 0.65754                                      | 6.18766                                      | 0.05454                  | 0.24385  | 0.9986         |
| 4     | 0.57378                                      | 5.42461                                      | 0.02864                  | 0.22246  | 0.99913        |
| 4.5   | 0.53116                                      | 4.83302                                      | 0.01644                  | 0.20343  | 0.9992         |
| 5     | 0.51172                                      | 4.36524                                      | 0.01038                  | 0.18724  | 0.99944        |
| 5.5   | 0.48801                                      | 3.98392                                      | 0.00685                  | 0.17595  | 0.99941        |
| 6     | 0.45921                                      | 3.6628                                       | 0.00475                  | 0.16845  | 0.99955        |
| 6.5   | 0.46422                                      | 3.39303                                      | 0.00348                  | 0.15642  | 0.99963        |
| 7     | 0.42255                                      | 3.16799                                      | 0.00241                  | 0.17403  | 0.9985         |
| 7.5   | 0.39414                                      | 2.94466                                      | 0.00193                  | 0.15628  | 0.99932        |
| 8     | 0.40508                                      | 2.76526                                      | 0.00149                  | 0.14379  | 0.9995         |
| 8.5   | 0.38548                                      | 2.60878                                      | 0.00116                  | 0.14791  | 0.99971        |
| 9     | 0.41106                                      | 2.46697                                      | 9.34269×10 <sup>-4</sup> | 0.1288   | 0.99981        |
| 9.5   | 0.38667                                      | 2.34654                                      | 7.80051×10 <sup>-4</sup> | 0.13423  | 0.99929        |
| 10    | 0.36785                                      | 2.23315                                      | 6.07002×10 <sup>-4</sup> | 0.13638  | 0.99961        |
| 11    | 0.32197                                      | 2.03157                                      | 3.86521×10 <sup>-4</sup> | 0.14918  | 0.99812        |
| 12    | 0.44022                                      | 1.85987                                      | 2.67843×10 <sup>-4</sup> | 0.11167  | 0.99944        |
| 13    | 0.45154                                      | 1.72191                                      | 1.70286×10 <sup>-4</sup> | 0.10081  | 0.99954        |
